# Supplementary material for: The Potential of Membrane Contactors in the Pre-Treatment and Post-Treatment Lines of a Reverse Osmosis Desalination Plant
Source: MDPI journal article supplement (doi:10.3390/separations10020129), 2023-02-14
Supplement: s1 [file s1]

## Supplementary material

In the following Figures, the different configurations of the lab set-up are reported.

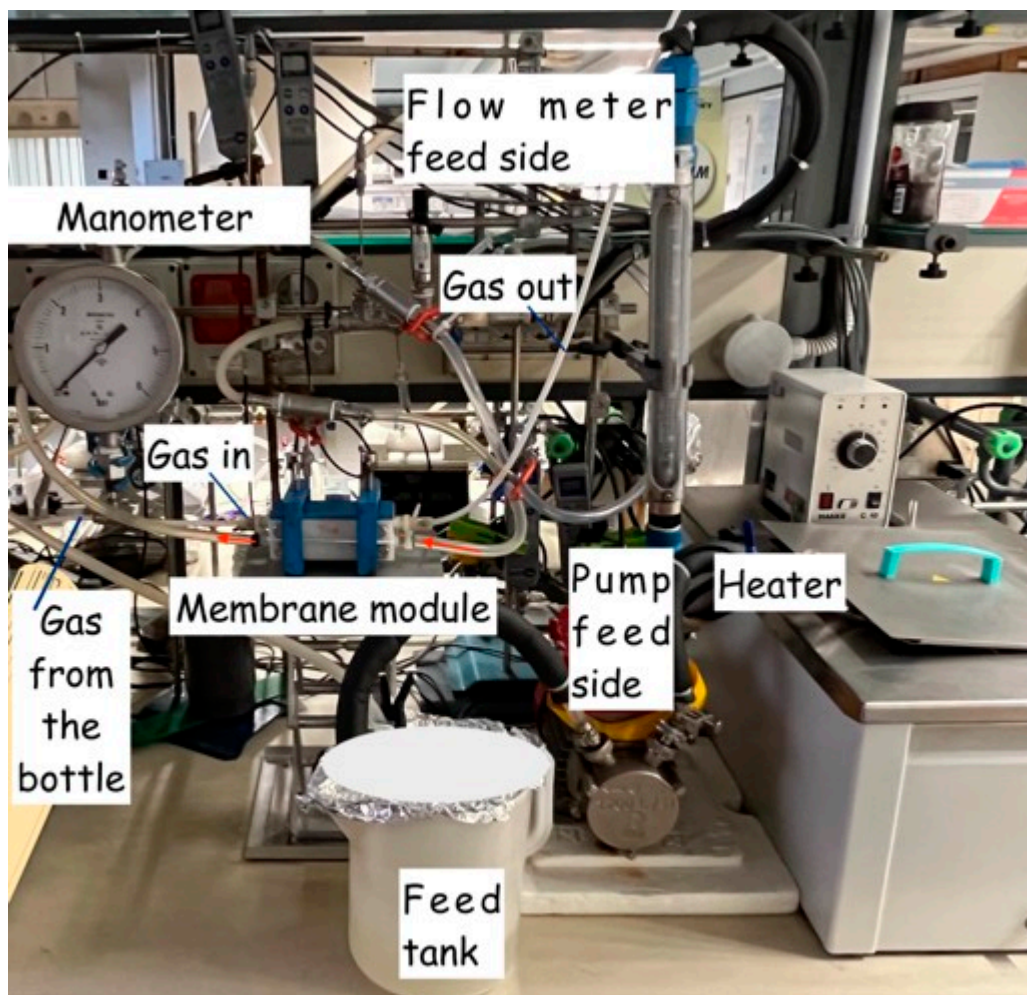

**Figure S1.** Gas-Liquid set-up.

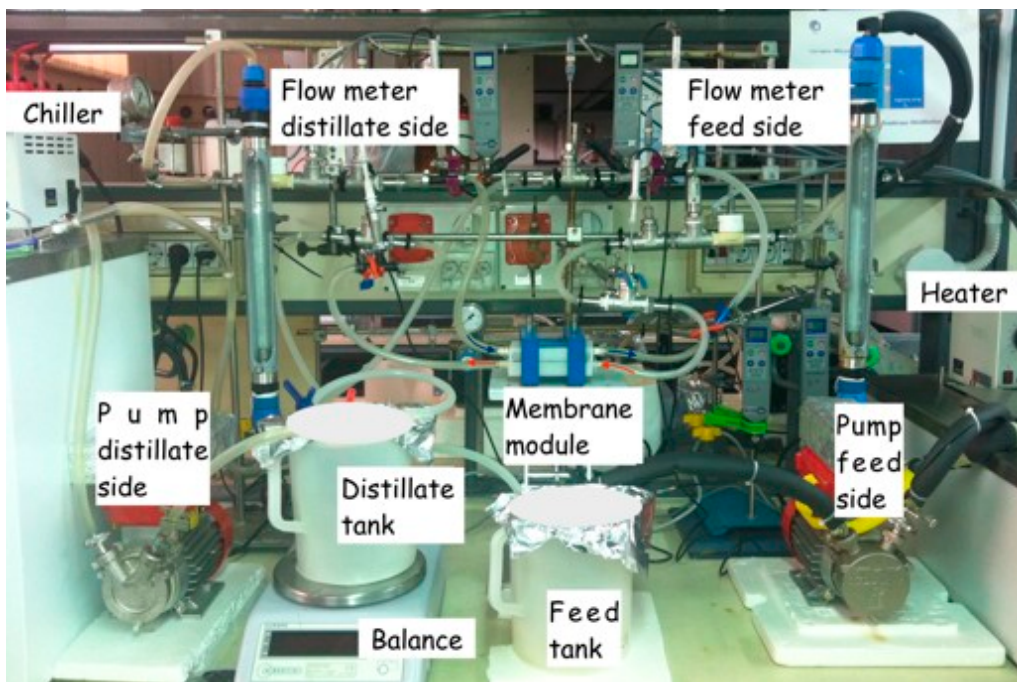

Figure S2. DCMD set-up.

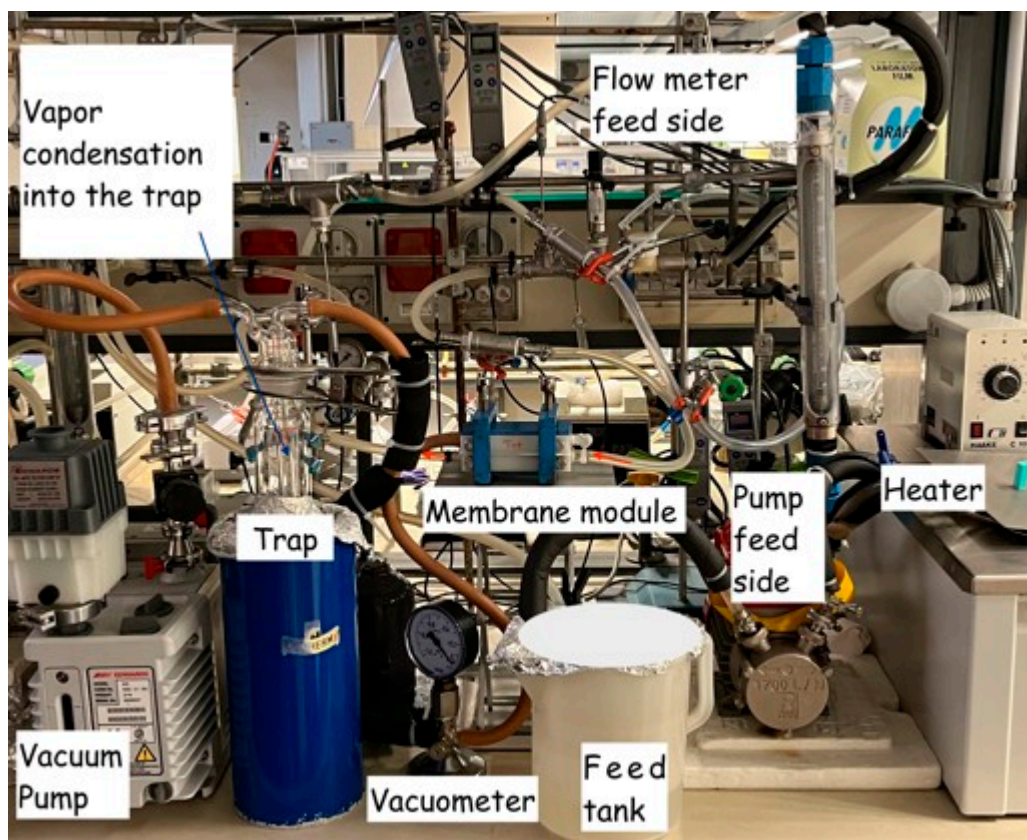

Figure S3. VMD set-up.
